# Supplementary material for: Novel mutations in IBA57 are associated with leukodystrophy and variable clinical phenotypes
Source: Springer Nature journal article supplement (doi:10.1007/s00415-016-8312-z), 2016-10-26
Supplement: MOESM4 [file 10985840]

**Supplementary Table 1A** Respiratory chain enzymatic activity in muscle biopsy

|  | CI/CS | CII/CS | SDH/CS | CIII/CS | CIV/CS | Citrate synthase* |
| --- | --- | --- | --- | --- | --- | --- |
| Pt.1 | 0.13 | **0.03 (16%)** | **0.03 (25%)** | 0.34 | 2.30 | 158 |
| Ct range | 0.11-0.30 | 0.12-0.25 | 0.07-0.16 | 0.16-0.52 | 1.70-4.00 | 141-311 |
| Pt.2 | 0.20 | **0.11 (37%)** | **0.07 (49%)** | 1.33 | 1.20 | 164 |
| Ct range | 0.15-0.31 | 0.20-0.40 | 0.10-0.20 | 0.80-1.60 | 0.80-1.80 | 90-200 |
| Pt.3 | **0.08 (38%)** | 0.17 | 0.12 | 1.01 | 1.20 | 97 |
| Ct range | 0.14-0.28 | 0.15-0.28 | 0.11-0.17 | 0.85-1.95 | 0.89-2.21 | 80-210 |
| Pt.4^ | 0.20 | **0.14 (52%)** | **0.07 (50%)** | 1.42 | 2.20 | 112 |
| Ct range | 0.14-0.28 | 0.15-0.40 | 0.11-0.17 | 0.76-1.41 | 0.86-1.95 | 81-175 |

*Citrate synthase (CS) expressed as: nmoles/min/mg proteins; In bold the values below the control range; in brackets the percentage of residual activity referred to the mean control value. The analyses were performed in different laboratories in different periods, and the control (Ct) ranges are diverse. ^: autoptic tissue

**Supplementary Table 1B** Respiratory chain complex and ATPase enzymatic activities in patients’ fibroblasts

|  | RCC defects | ATP synthesis* | | |
| --- | --- | --- | --- | --- |
|  |  | Succ | Mal | Mal+Pyr |
| Pt.1 | n.p. | 38% | 50% | 58% |
|  |  |  |  |  |
| Pt.2 | CII 38%, SDH 56% | 86% | 87% | 94% |
|  | 1st biopsy | 2nd biopsy | | |
| Pt.3 | N |  | n.p |  |
|  |  |  |  |  |
| Pt.4 | CII 50% |  | n.p. |  |
|  |  |  |  |  |

n.p.: not performed. N: normal, value in the control range. *CV (ATPase) activity was measured in the direction of ATP synthesis using succinate (Succ), malate (Mal) or malate+pyruvate (Mal+Pyr) as substrates.
